# Supplementary material for: Superior one-pot synthesis of a doped graphene oxide electrode for a high power density supercapacitor
Source: Royal Society of Chemistry journal article supplement (doi:10.1039/c8nj01672k), 2018-01-01
Supplement: c8nj01672k1.pdf [file c8nj01672k1.pdf]

Electronic Supplementary Material (ESI) for New Journal of Chemistry

This Journal is © The Royal Society of Chemistry and the Center National de la Recherche Scientifique 2018

## Electronic Supplementary Information (ESI)

### Superior One-pot Synthesis of Doped Graphene Oxide Electrode for High Power Density Supercapacitor

Malarkodi Duraivel<sup>a</sup>, Saravanan Nagappan<sup>b</sup>, B. Balamuralitharan<sup>a</sup>, S. Selvam<sup>c</sup>, S. N.

Karthick<sup>d</sup>, K. Prabakar<sup>a</sup>, Chang-Sik Ha<sup>b</sup> and Hee-Je Kim<sup>a\*</sup>

<sup>a</sup> *Department of Electrical and Computer Engineering, Pusan National University, Geumjeong-Gu, Jangjeon-Dong, Busan-46241, Republic of Korea. Tel: +82-51-510-2364 fax: +82-51-513-0212; Email address: Hee-Je Kim ([heeje@pusan.ac.kr](mailto:heeje@pusan.ac.kr))*

<sup>b</sup> *Department of Polymer Science and Engineering, Pusan National University, Geumjeong-Gu, Jangjeon-Dong, Busan-46241, Republic of Korea.*

<sup>c</sup> *Department of Chemical and Biochemical Engineering, Dongguk University, Pil-Dong, Seoul-100715, Republic of Korea.*

<sup>d</sup> *Department of Chemistry, Bharathiar University, Coimbatore-641046, Tamil Nadu, India.*

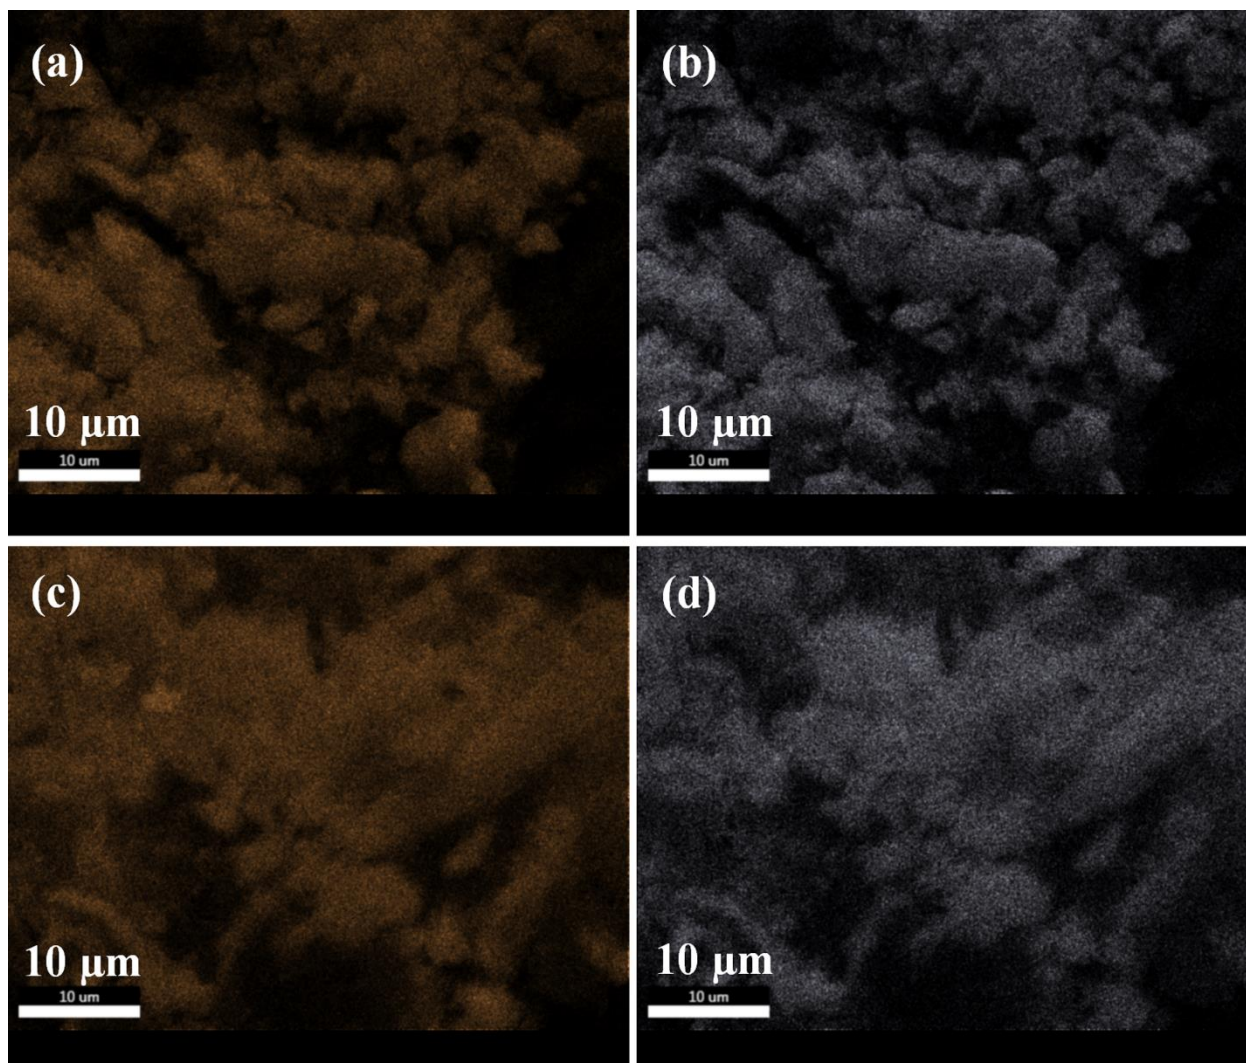

**Figure S1.** FESEM elemental compositions mapping images of GO and rGO (carbon (a and c) and oxygen (b and d)).

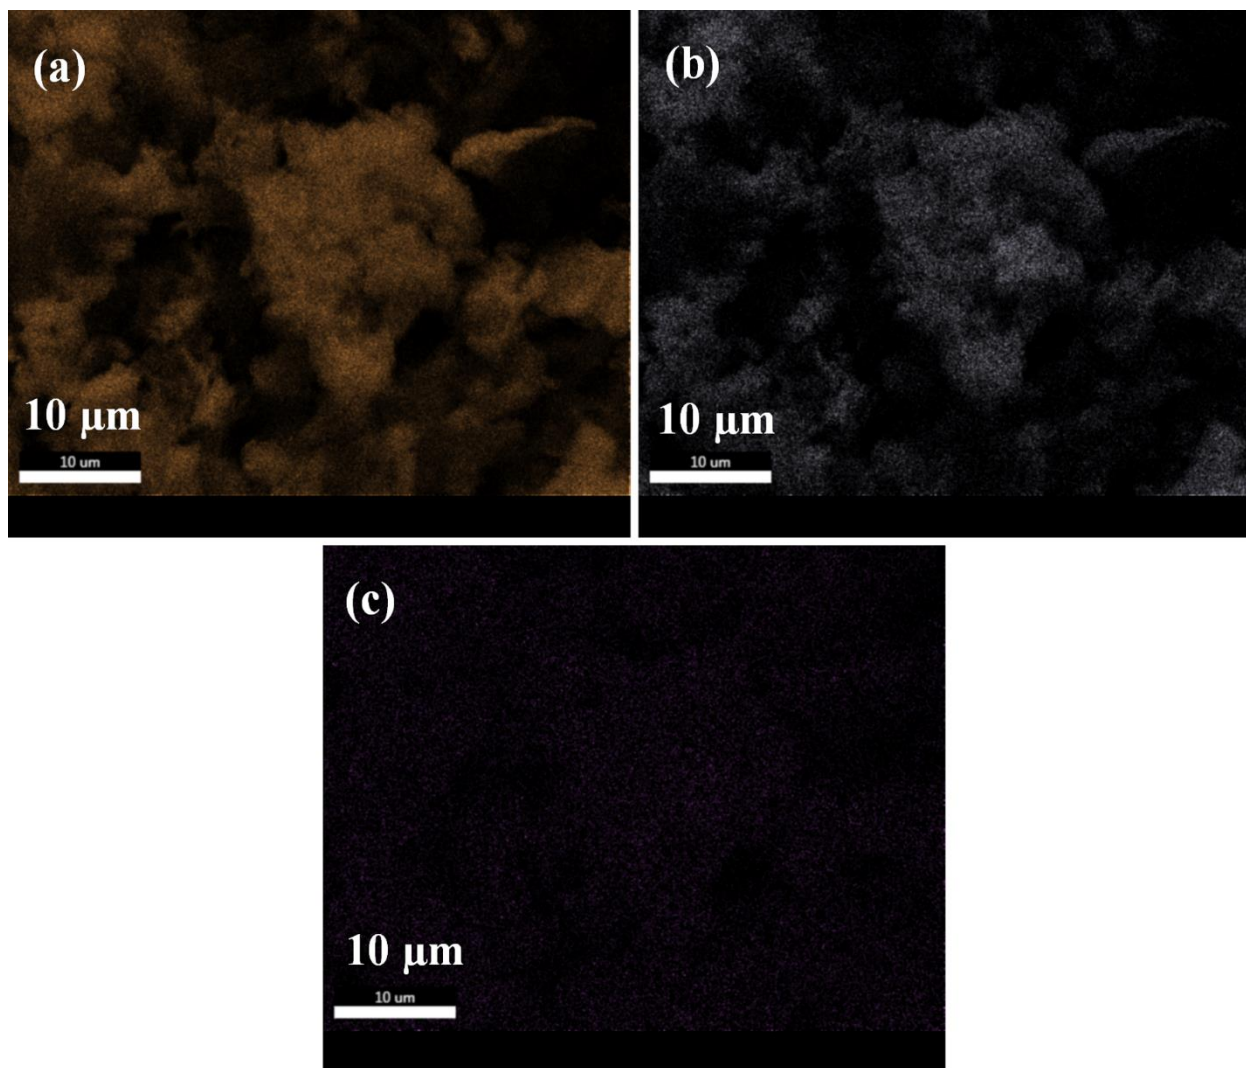

**Figure S2.** FESEM elemental compositions mapping images of S-rGO (carbon (a), oxygen (b), and sulfur (c)).

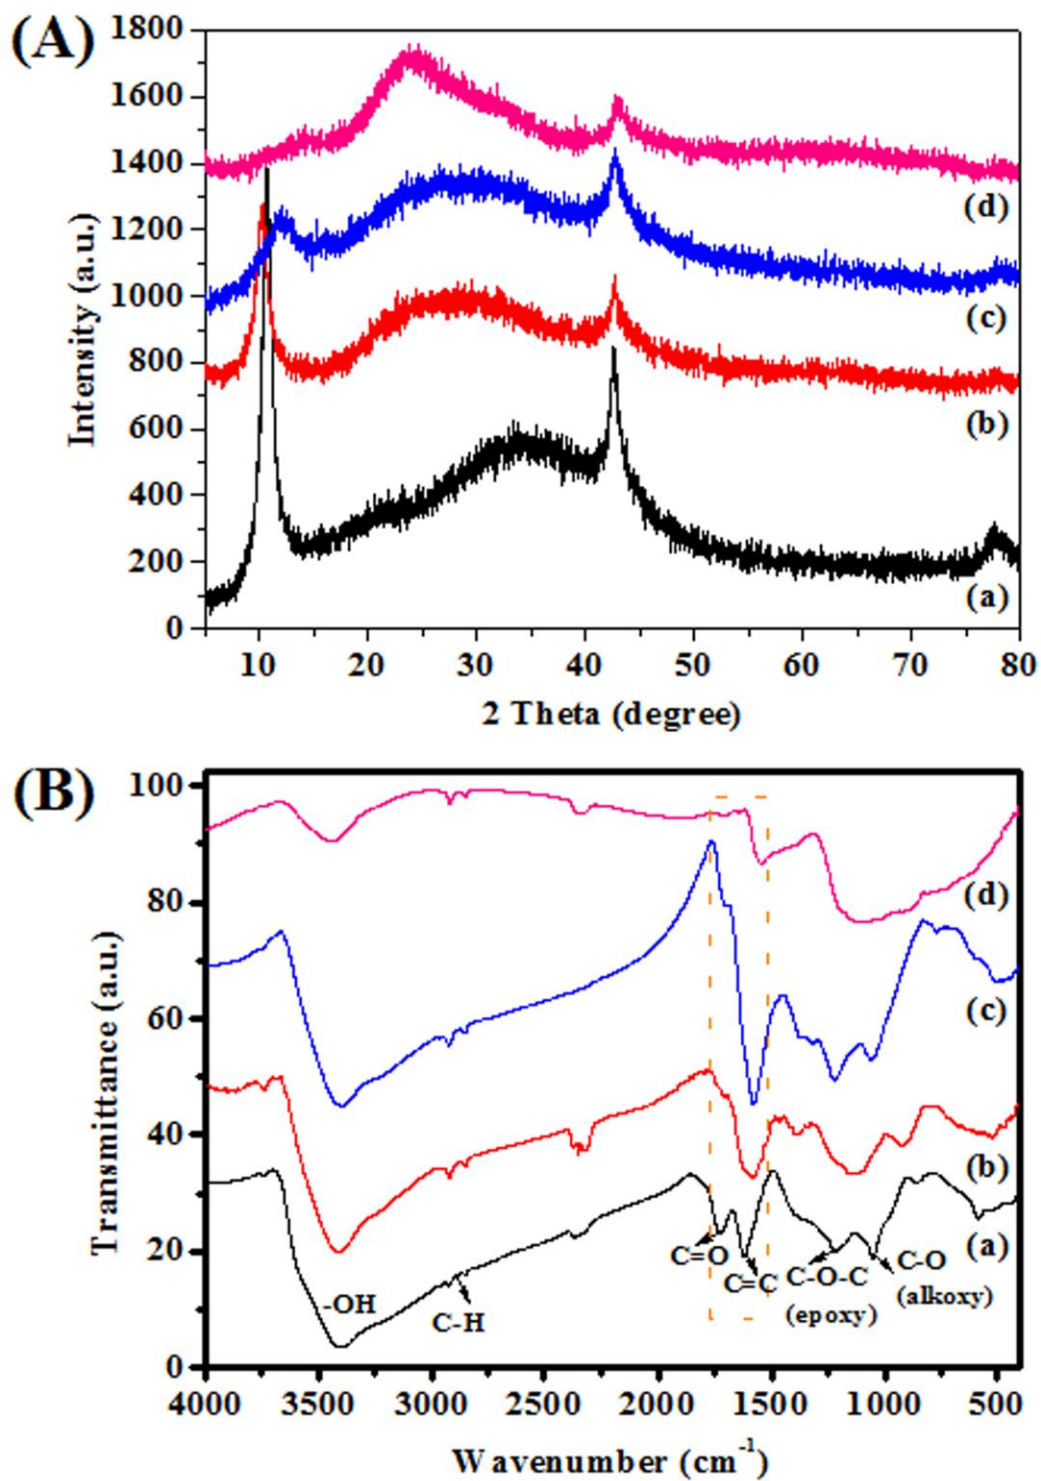

**Figure S3.** (A) XRD patterns and (B) FTIR spectra of GO (a), rGO (b), S-rGO (Na<sub>2</sub>S) (c), and S-rGO (Na<sub>2</sub>S+NaBH<sub>4</sub>) (d), respectively.



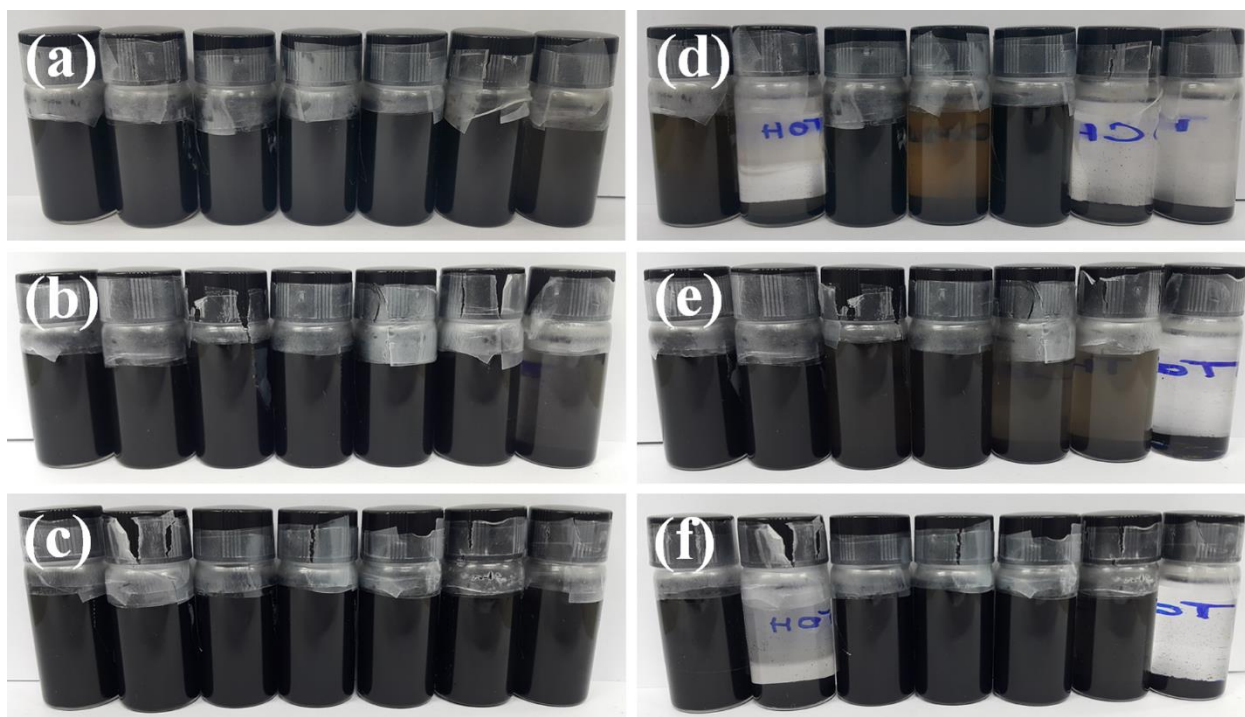

**Figure S4.** The stability of (a) GO, (b) rGO, and (c) S-rGO suspensions after sonication in various solvents (from left to right (deionised water, ethanol, dimethylacetamide, dimethylformamide, tetrahydrofuran, chloroform, and toluene). (d-f) The stability of the suspensions after stored at dark condition for 1 day.

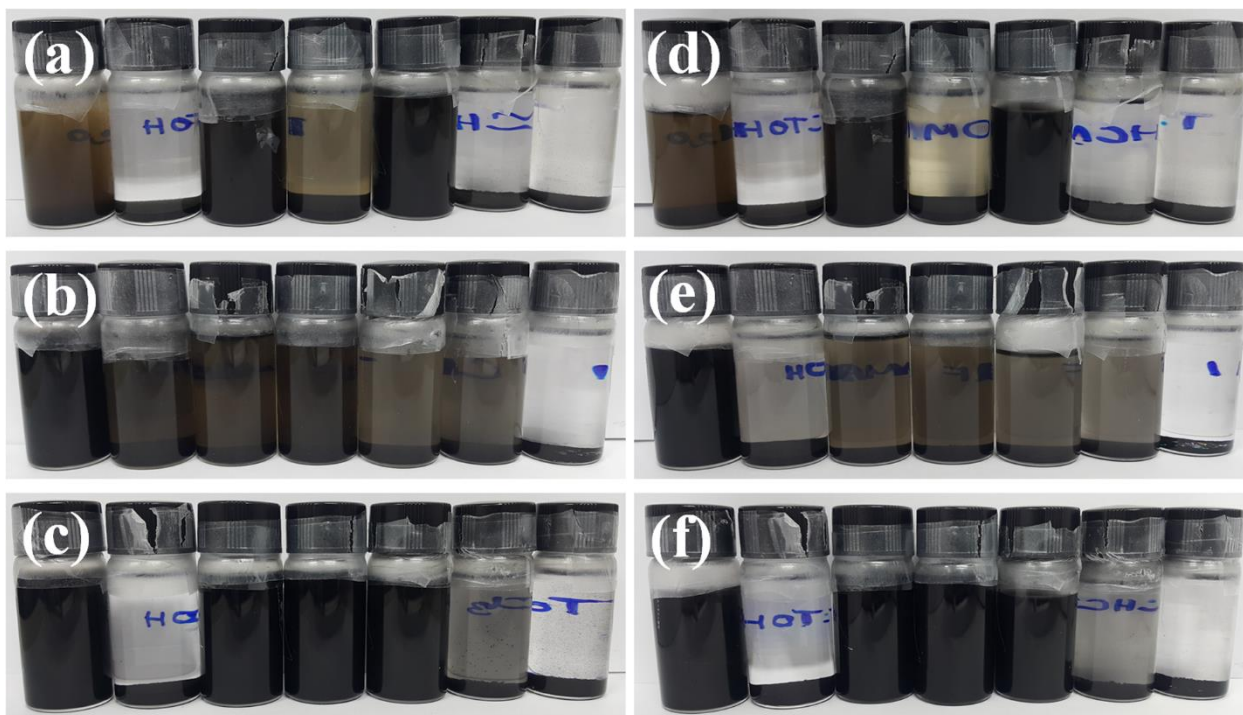

**Figure S5.** The stability of the suspensions GO, rGO, and S-rGO after stored at dark condition for 5 days (a-c) and 10 days (d-f).

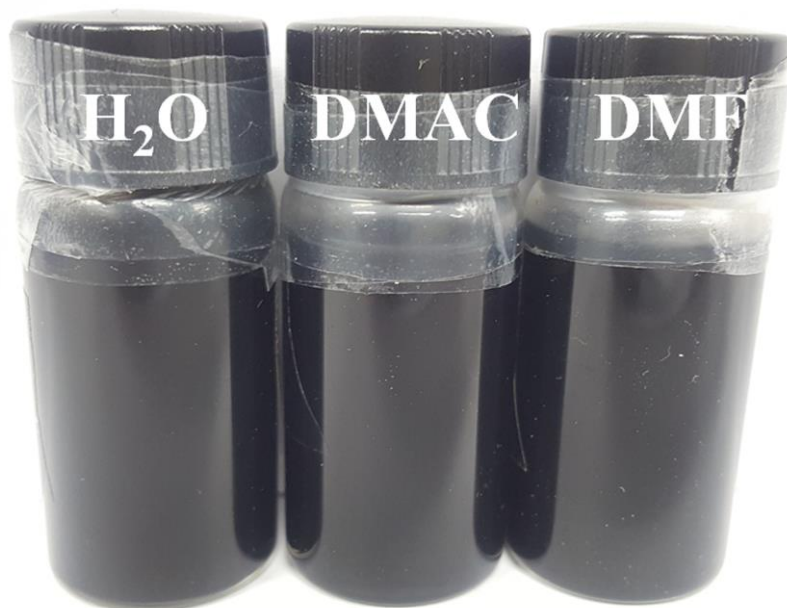

**Figure S6.** The stability of the suspensions S-rGO after stored at dark condition for around 1 year in water, DMAC and DMF.

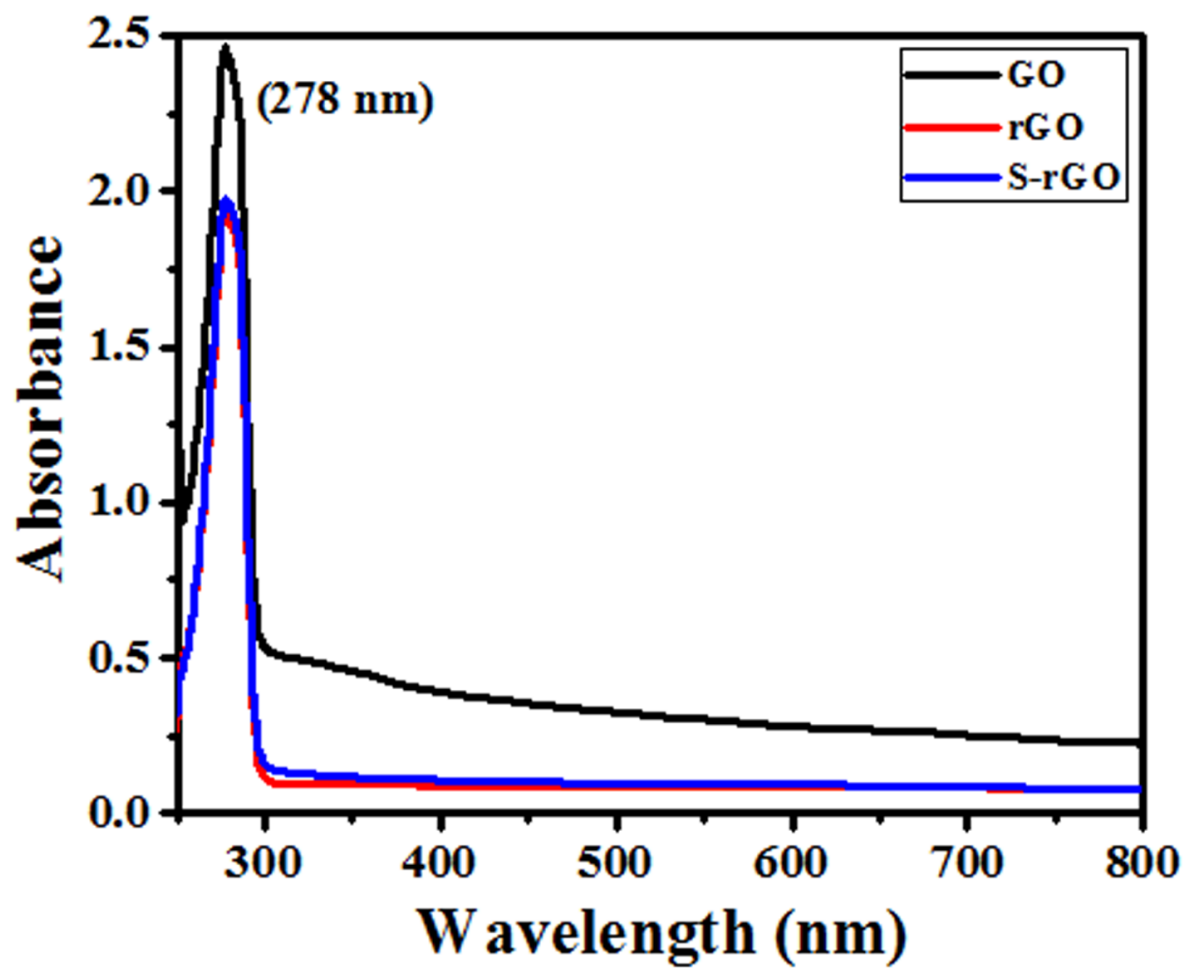

**Figure S7.** UV-visible spectra of the synthesised GO, rGO, and S-rGO suspensions in THF.



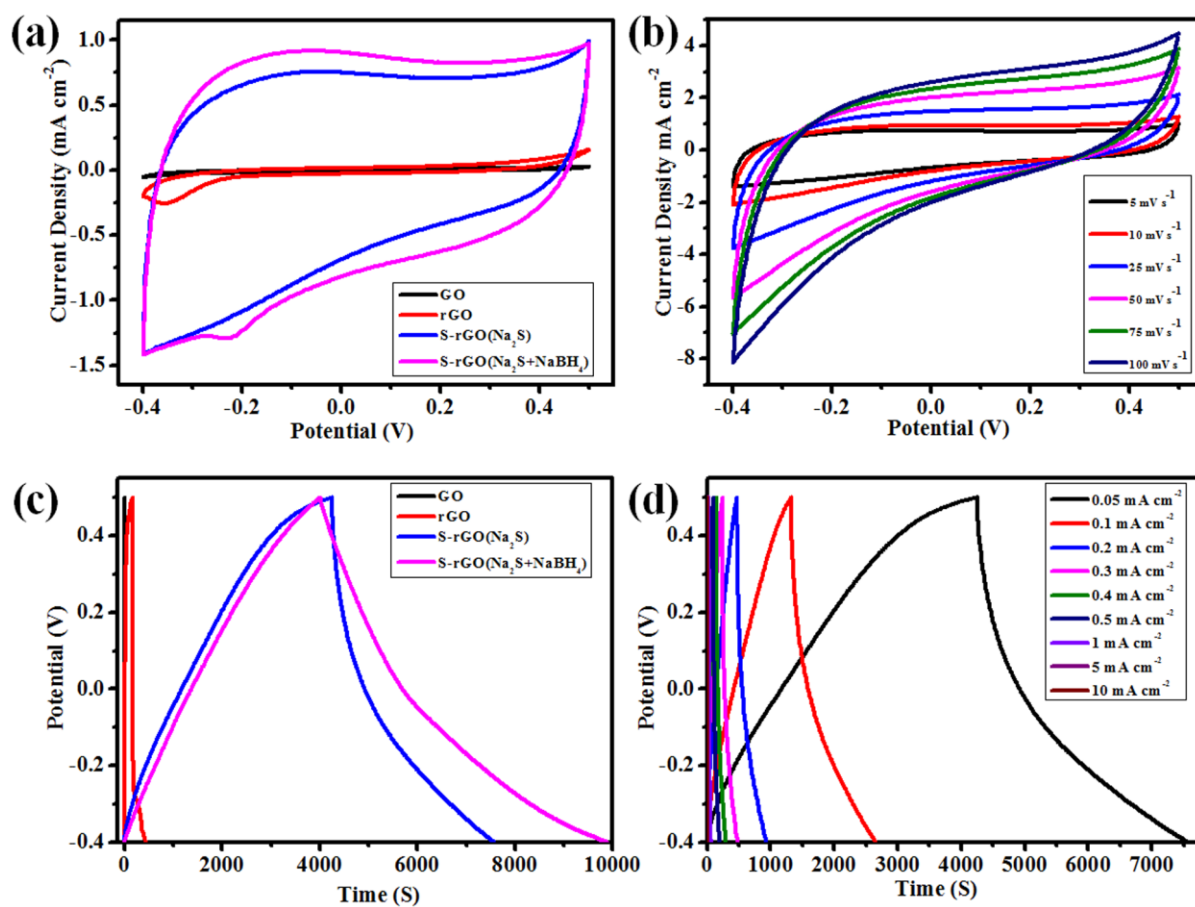

**Figure S8.** (a) CV graphs of GO, rGO, S-rGO (Na<sub>2</sub>S), and S-rGO (Na<sub>2</sub>S+NaBH<sub>4</sub>) at 5 mV s<sup>-1</sup> scan rate. (b) CV graph of S-rGO (Na<sub>2</sub>S) at different scan rates. (c) Galvanostatic charge-discharge analysis of the four samples at the current density of 0.05 mAcm<sup>-2</sup>, (d) CD analysis of S-rGO (Na<sub>2</sub>S) sample at different current densities.

**Table S1.** XPS chemical composition values of GO, rGO, and S-rGO.

| <b>Name</b> | <b>GO (At. %)</b> | <b>rGO (At. %)</b> | <b>S-rGO (At. %)</b> |
|-------------|-------------------|--------------------|----------------------|
| C1s         | 65.67             | 75.75              | 84.75                |
| O1s         | 34.33             | 24.25              | 14.85                |
| S2p         | -                 | -                  | 0.4                  |
